# Supplementary material for: Outdoor Airborne Transmission of Coronavirus Among Apartments in High-Density Cities
Source: Frontiers journal article supplement (doi:10.3389/fbuil.2021.666923), 2021-05-04
Supplement: Data_Sheet_1.docx [file Data_Sheet_1.docx]

# Appendix

A detailed indoor multizone model developed by Li et al. (2005). The model accounts for external wind speed and directions derived from a CFD simulation. The buoyancy effect of the indoor air, considered to be 0.5 C higher than the outdoor environment, is accounted for. Each apartment is considered as a zone connected with each other by flow paths, such as cracks, windows, doors, and shafts, to form a flow network. The effective leakage area (ELA) of a close window or a door is assumed to be 0.4-1.8% of the window or door area. The virus-containing bio-aerosols were model as a passive tracer, discharged from the source at a constant strengthen at 150 µg/s. The model was used to predict hourly viral concentration under changing wind speed and directions, for a period of 30 hour between 8:00 AM on March 19 and 14:00 on March 20, in which the average viral concentration values were computed for each apartment. (Table A1)

Table A1 Simulated average hourly viral concentration (µg/m3) over the 30-hour period for Amoy Gardens during the SARS outbreak. Source (Li et al., 2005)


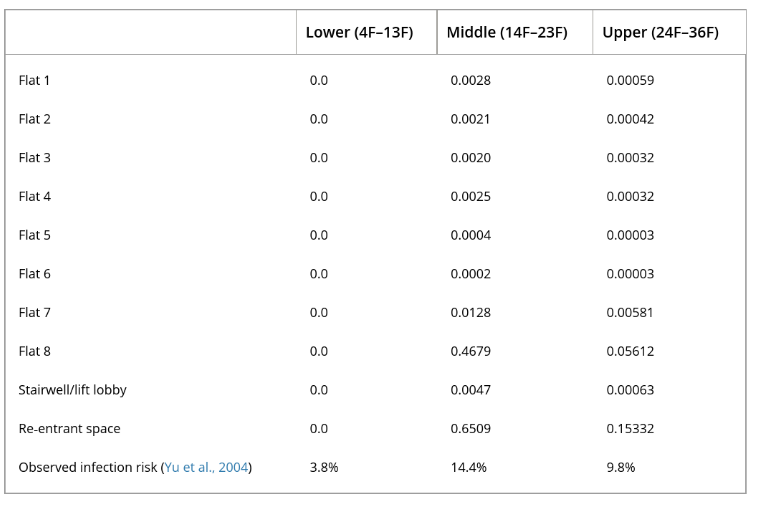


To account for possible tertiary or higher order infections that occurred during the Amoy Gardens SARS outbreak, logistic regression was run using a subset of 52 apartments (62 infected individuals) with early symptom onset on or before March.24, within five days of the disease incubation period, which are less likely to be tertiary or higher order infections. The results are presented in Table A2. The dependent variable was the SARS infection in apartments (binary) with symptom onset on or before March 24, 2003. The independent variables were the predicted viral exposure (quanta) and the dummy variable of intra-building transmission, in this case only eligible for the regression model for all four buildings. It was found that the predicted viral exposure was positively associated with SARS infection in all four buildings (p<0.001) and in block B (p<0.001) with consistently high odds ratio. Additionally, being in the same building with the primary patient inflicts an additional risk of SARS infection (p<0.001), suggesting that intra-building transmission route have played a role.

Table A2 Logistic regression of diagnosed SARS infection (on or before March 24, 2003) in apartments versus predicted viral exposure

|  | ***All Buildings*** | | ***Block E*** | | ***Block C*** |
| --- | --- | --- | --- | --- | --- |
| *N* | *1,056* | | *264* | | *264* |
| *LR chi2(1)* | *76.11* | | *32.87* | | *12.92* |
| *Prob > chi2* | *0.000* | | *0.000* | | *0.000* |
| *Pseudo R2* | *0.181* | | *0.159* | | *0.312* |
| *Log likelihood* | *-172.167* | | *-86.856* | | *-14.268* |
| *Infection* | *Odds Ratio (p-value)* | | *Odds Ratio (p-value)* | | *Odds Ratio (p-value)* |
| *Viral Exposure (quanta)* | *11.620* | *(0.000)**** | *12.648 (0.000)**** | | *1.27107(0.002)*** |
| *Indoor Route* | *4.288* | *(0.000)**** | *n.a.* | | *n.a.* |
| *Intercept* | *0.019* | *(0.000)**** | *0.077* | *(0.000)**** | *0.001(0.000)**** |

*** 99.9% confidence level ** 99% confidence level

A detailed comparison between the indoor and the outdoor models is shown in Fig. A1, in which the number of infected apartments are plotted against the predicted mean viral concentration by the outdoor (Fig. A1(a)) and indoor (Fig. A1(b)) route. Values are aggregated by apartments of the same number (#1-8) for the lower, middle, and upper proportion of Block E. Again, the outdoor route model appears to have outperformed the indoor route model by having a higher R2 value (outdoor 0.51 versus indoor 0.27). The indoor route model appears to have underestimated viral concentration in Apt. E8, E2, and E1 at the middle levels as well as the Apt. E1 and E2 at upper levels, in comparison with the outdoor route model. The comparison should not be interpreted as to dismiss the viability of indoor route transmission, which probably took place alongside outdoor route.


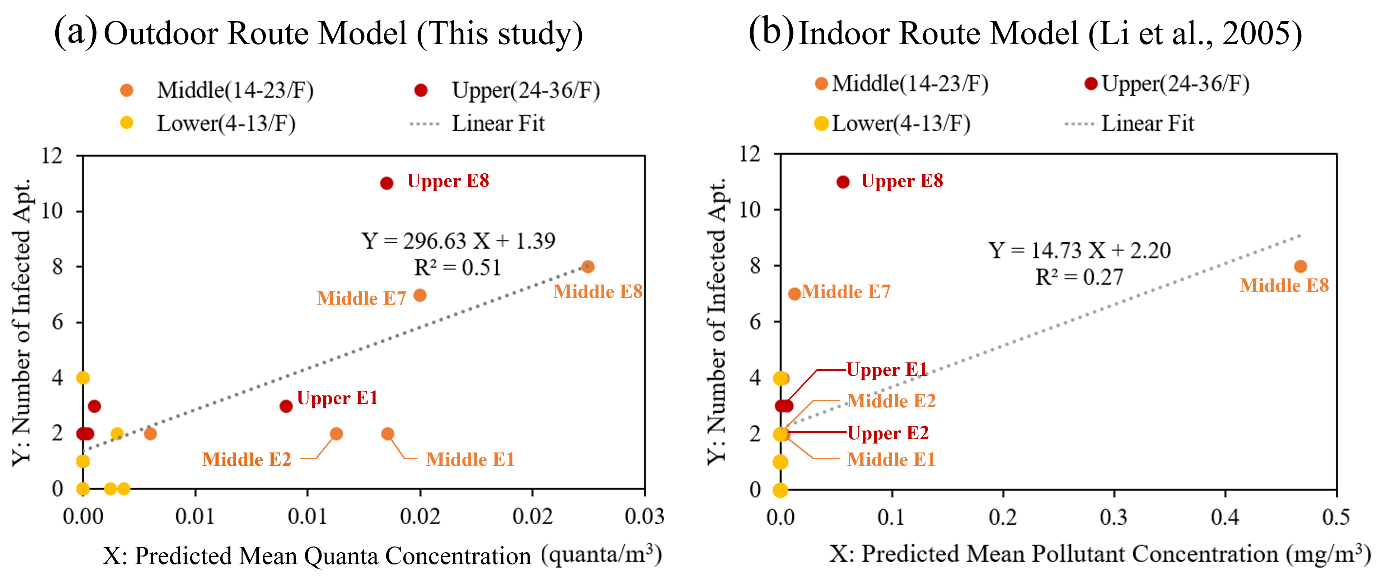


Fig. A1 Number of infected Apartments in Block E in Amoy Gardens versus predicted mean viral concentration for the outdoor route model (a) and the indoor route model(b) (Li et al., 2005, p.22); values are aggregated by apartments of the same number for the lower, middle, and upper proportion of Block E in Amoy Gardens.

**Back-Calculation of Source Quanta Emission Rate**

The source quanta emission rate of the primary patients can be established based on the disease infection patterns. Estimates are made for the COVID-19 outbreak in the Luk Chuen House and the SARS outbreak in Amoy Garden. Fig. A2 presents the scatter plot of disease infection versus predicted inhaled viral exposure at apartment level for COVID-19 in Luck Chuen House. Each red dot represents one of the 98 apartment units in the same wing as the primary case. The predicted dose-response curve is shown as a black line with a 95% confidence interval. Due to the small number of infected apartments available, the characteristic sigmoid curve was extended to the 0.63 probability level based on projection, which corresponds to a viral exposure value at one quantum. The source quanta emission rate for the primary patient of COVID-19 can therefore be backcalculated at 60 quanta per hour (q/hr), with the 95% confidence interval between 30 and100 q/hr. The value was based on the outdoor route transmission only. If an alternative mode of transmission occurred such as close personal contact or indoor airborne, then the backcalculated source quanta emission rate would have been lower.

The estimated source quanta emission rate of 60 q/hr for COVID-19 is comparable with findings of several studies. Estimates ranged from 4.9 to 31q/hr for speaking with light activities (Buonanno, Morawska and Stabile, 2020) or above 100 for speaking and walking (Buonanno, Stabile and Morawska, 2020). Higher estimates were made for super-spreading events at 460 (Prentiss, Chu and Berggren, 2020), or 970 q/hr (Miller *et al.*, 2020).


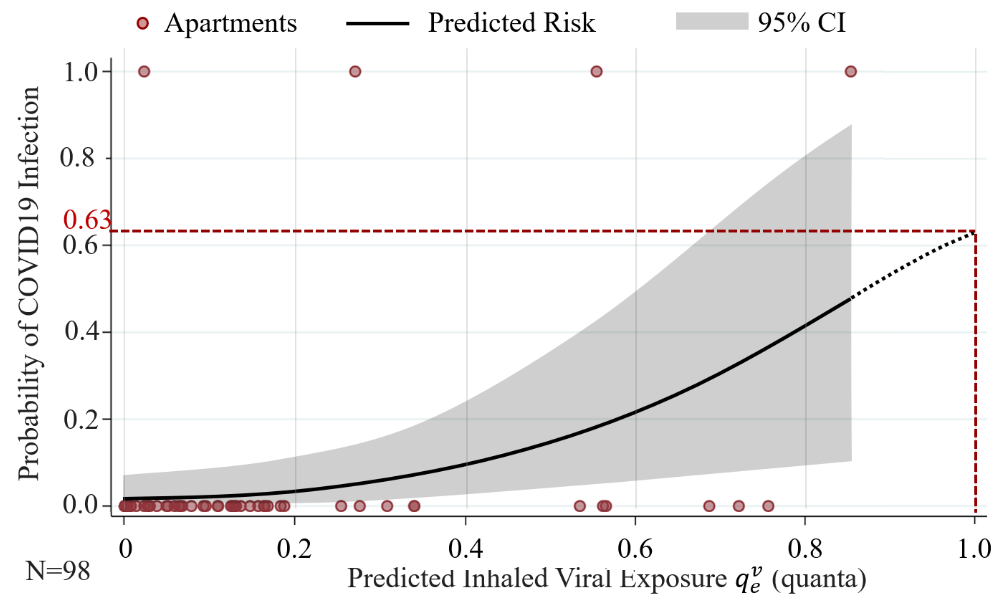


Fig. A2 Scatter plot of infection versus predicted inhaled viral exposure during the 5-day period of exposure at apartment level during the COVID-19 outbreak in Luk Chuen House.

Estimates for the source quanta emission rate of the SARS outbreak in Amoy Gardens is presented in Fig. A3, with the predicted infection risk shown in the characteristic sigmoid curve (black line). The viral exposure value at 63% infection risk is defined as one quantum. The source quanta emission rate can therefore be reversely estimated to be = 680 quanta per hour (q/hr), with the 95% confidence interval between 564 and 850 q/hr. The value was based on a five-day exposure period since the arrival of the index patient on Mar.19, 2003. For a shorter exposure period, the estimated source quanta emission rate would have been higher.


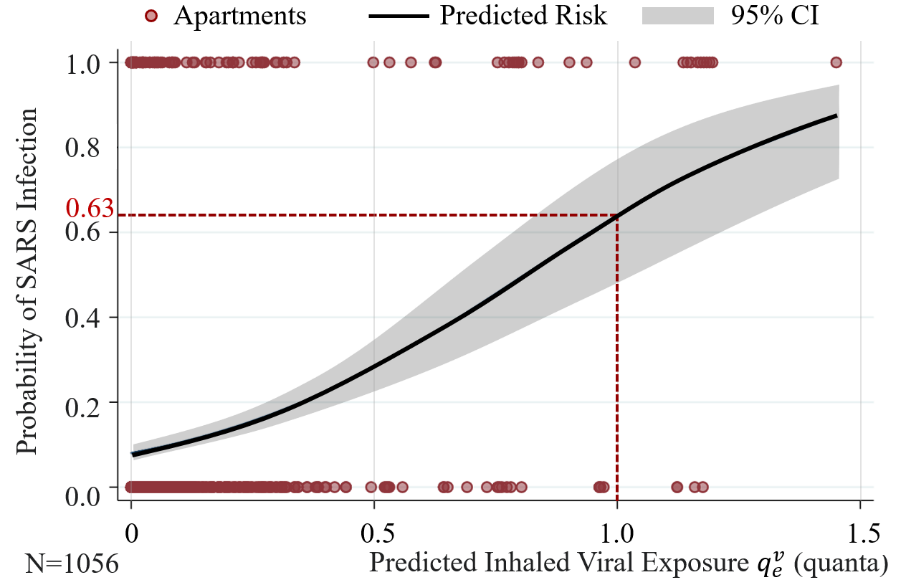


Fig. A3 Scatter plot of SARS infection versus predicted inhaled viral exposure during the 5-day period of exposure at apartment level during the SARS outbreak in Amoy Gardens. Each red dot represents one of the 1,056 apartment units in Block B, C, D, E in Amoy Gardens Phase I. The predicted dose-response curve is shown in blue line with 95% confidence interval.

The estimated source quanta emission rate of 680 q/hr for SARS is considerably higher when compared with existing estimates of 28 q/hr in a hospital setting (Liao, Chang and Liang, 2005), although it is within the range of estimates in the previously mentioned COVID-19 literature. The high values of for the SARS outbreak in Amoy Gardens is partially attributable to the flawed toilet drainage system: multiple studies (Yue et all, 2004) (Li *et al.*, 2006) pointed to the generation of large quantities of fecal-aerosols via toilet flushing by the primary patient during the Amoy Gardens SARS outbreak. The aerosols were drawn back to the apartment through a dried-out U-trap of floor drain, driven by the backpressure and the suction of the exhaust fans, as it is evidenced in several simulation and tracer gas studies (Li *et al.*, 2006; Kang *et al.*, 2020). Such flaws in the toilet drainage system were not found in the COVID-19 outbreak in the Luk Chuen House (ON.CC, 2020).
